# Supplementary material for: Cellulose-based material with amphiphobicity to inhibit bacterial adhesion by surface modification
Source: Royal Society of Chemistry journal article supplement (doi:10.1039/c2jm31750h), 2012-01-01
Supplement: c2jm31750h.pdf [file c2jm31750h.pdf]

**Electronic Supporting Information**

**Cellulose-based material with amphiphobicity to inhibit bacterial adhesion  
by surface modification**

Chengfeng Jin, Yufeng Jiang, Tao Niu and Jianguo Huang\*

*Department of Chemistry, Zhejiang University, Hangzhou, Zhejiang 310027, China*

*E-mail: jghuang@zju.edu.cn*

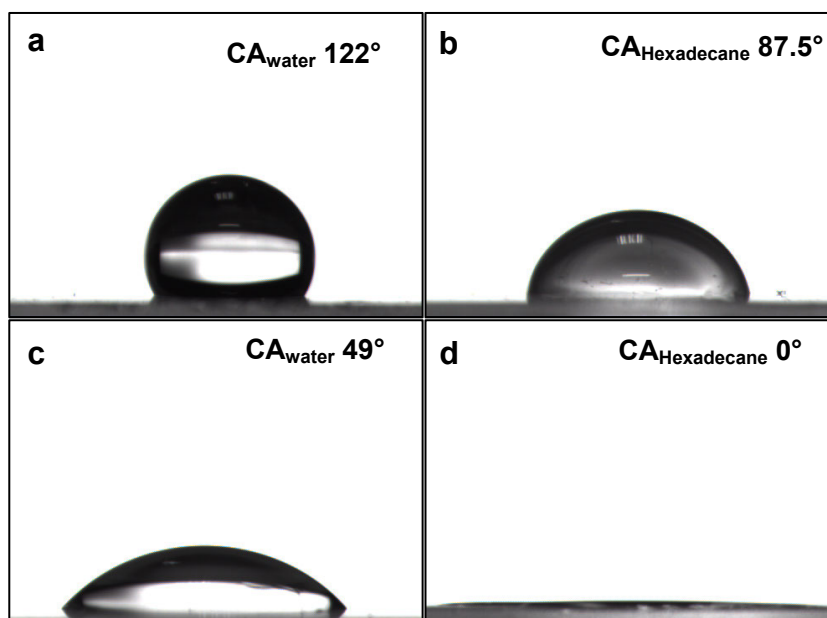

**Fig. S1** Profiles of water and hexadecane droplets on the surface of (a, b) flat quartz plates coated with titania/PFOTMS composite ultrathin films, and (c, d) flat quartz plates deposited with ultrathin titania films.
